# Supplementary material for: Aqueous amination of track-etched polycarbonate membranes for tuneable nanochannel surface charge density
Source: Royal Society of Chemistry journal article supplement (doi:10.1039/d5ra06556a), 2025-01-01
Supplement: d5ra06556a1.pdf [file d5ra06556a1.pdf]

**Supporting Information**

**Aqueous Amination of Track-Etched Polycarbonate Membranes for  
Tuneable Nanochannel Surface Charge Density**

Anjali Ashokan, Kamil Rahme, Subhajit Biswas\* and Justin D. Holmes\*

*School of Chemistry, University College Cork, Cork, T12 YN60, Ireland.*

*AMBER Centre, Sustainability Institute, University College Cork, Cork, T23 XE10, Ireland.*

\*Corresponding authors: [j.holmes@ucc.ie](mailto:j.holmes@ucc.ie) & [s.biswas@ucc.ie](mailto:s.biswas@ucc.ie)

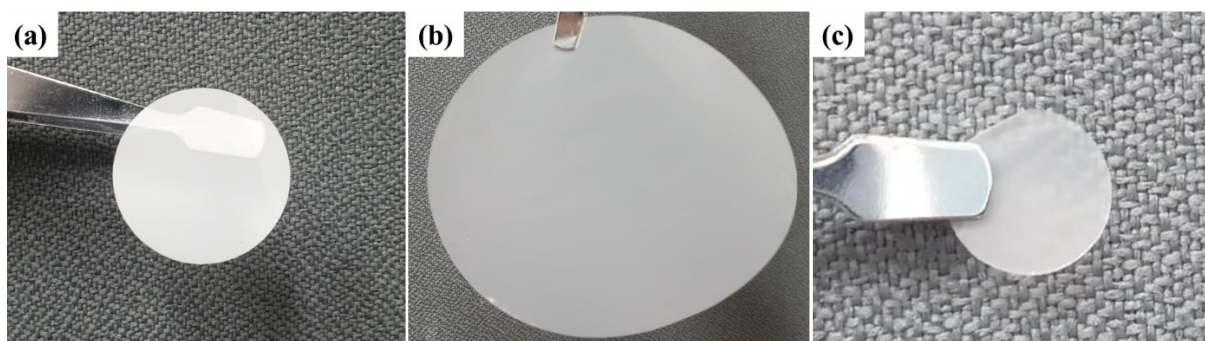

**Figure S1.** Photographic images of Isopore™ Merck Millipore membranes with nominal pore sizes of (a) 0.1  $\mu\text{m}$ , (b) 0.05  $\mu\text{m}$ , and (c) 0.015  $\mu\text{m}$ .

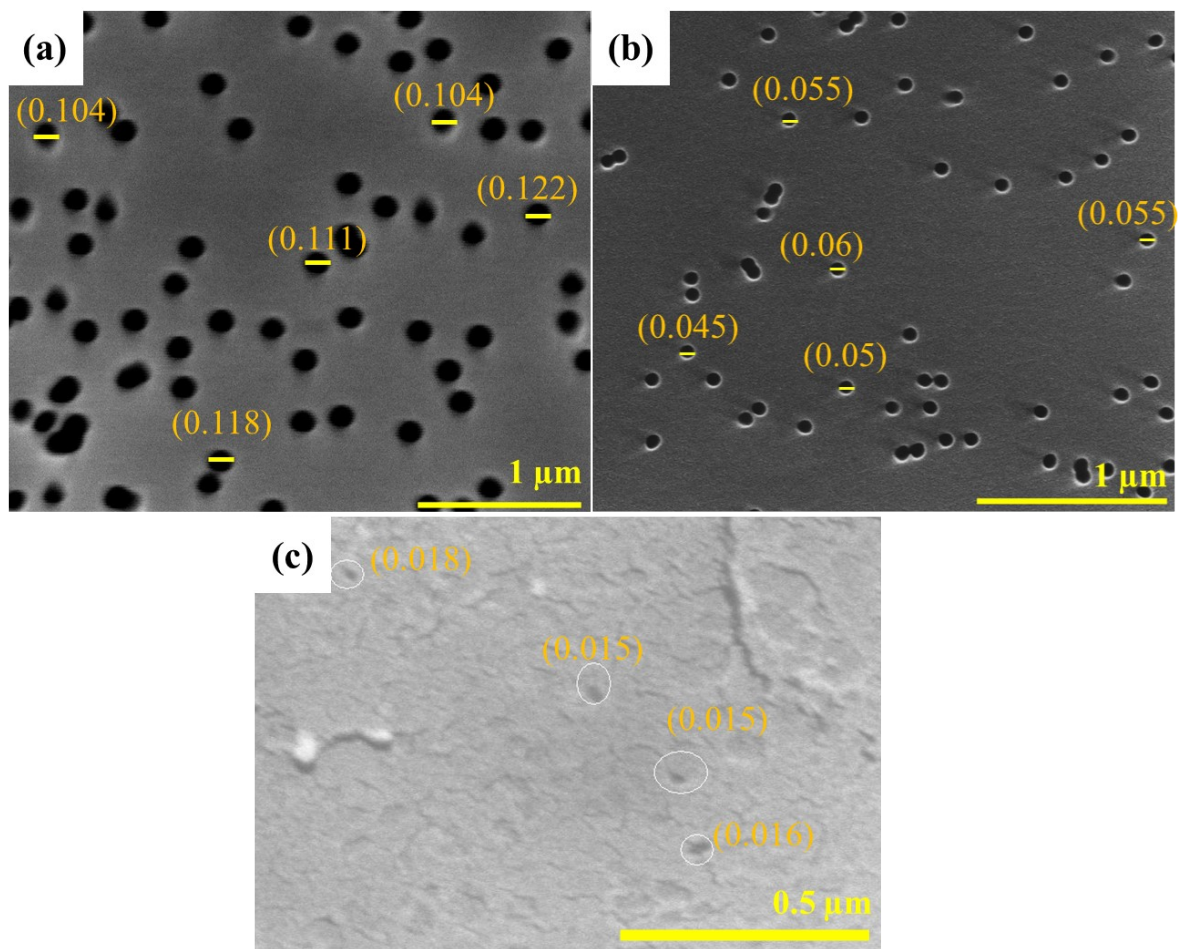

**Figure S2.** SEM images of Isopore™ Merck Millipore membranes with pore sizes of (a) 0.1 μm, (b) 0.05 μm, and (c) 0.015 μm, analysed using ImageJ software.

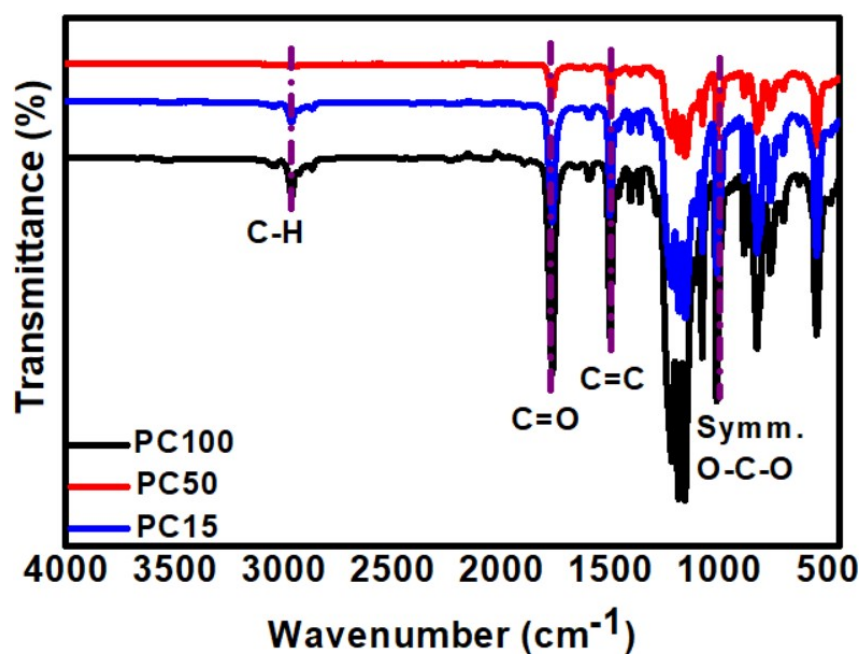

**Figure S3.** FTIR spectra of pristine PC100, PC50, and PC15 membranes.

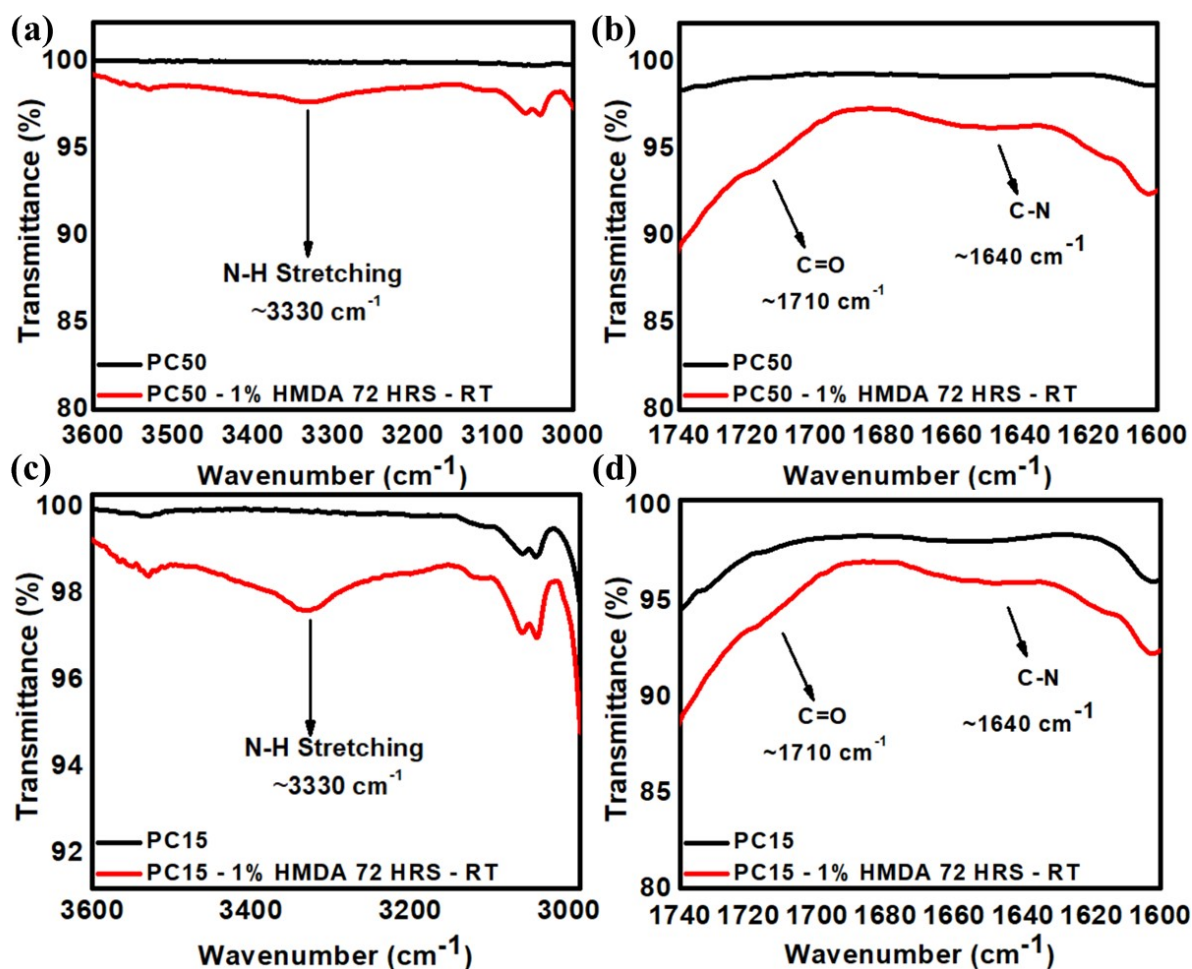

**Figure S4.** FTIR spectra of (a), (b) PC50 and (c), (d) PC15 membranes before and after functionalisation with 1 % w/v HMDA, highlighting (i) the 3000-3600  $\text{cm}^{-1}$  region, where N-H stretching bands from HMDA appear, and (ii) the 1600-1740  $\text{cm}^{-1}$  carbonyl (C=O) region, where slight shifts indicate urethane bond formation between HMDA and PC.

**Table S1.** Contact angles of PC membranes (0.1, 0.05, and 0.015  $\mu\text{m}$ ) were measured for untreated (blank) samples and for those treated with 1 % w/v HMDA for 72 h at room temperature.

| <b>Membrane</b>                    | <b>Mean Contact Angle (°)</b> |
|------------------------------------|-------------------------------|
| 100 nm pore size:                  |                               |
| - PC100-BLANK                      | 71.7                          |
| - PC-100-HMDA, 1 % w/v, 72 h at RT | 91.7                          |
| 50 nm pore size:                   |                               |
| - PC50-BLANK                       | 67.8                          |
| - PC-50-HMDA, 1 % w/v, 72 h at RT  | 95.3                          |
| 15 nm pore size:                   |                               |
| - PC15-BLANK                       | 64.5                          |
| - PC-15-HMDA, 1 % w/v, 72 h at RT  | 81.2                          |

**Table S2.** Contact angles of PC membranes (0.1, 0.05, and 0.015  $\mu\text{m}$ ) for untreated (blank) samples and for those treated with 1 % w/v TETA for 74 h at room temperature, followed by heating at 70 °C for 2 h.

| Membrane                                                   | Mean Contact Angle (°) |
|------------------------------------------------------------|------------------------|
| 100 nm pore size:<br>- PC100-BLANK                         | 64.6                   |
| - PC-100-TETA, 1 % w/v, 74 h at RT                         | 66.11                  |
| - PC-100-TETA, 1 % w/v, 74 h at RT,<br>then 2 h at 70 °C   | 56.4                   |
| 50 nm pore size:<br>- PC50-BLANK                           | 67.8                   |
| - PC-50-TETA, 1 % w/v, 74 h at RT                          | 67.8                   |
| - PC-50-TETA, 1% w/v, 74 h at RT,<br>then 2 h at 70 °C     | 55.9                   |
| 15 nm pore size:<br>- PC15-BLANK                           | 64.5                   |
| - PC-15-TETA, 1 % w/v, 74 h at RT                          | 63.5                   |
| - PC-15-TETA, 1 % w/v, at 74 h at RT,<br>then 2 h at 70 °C | 51.4                   |

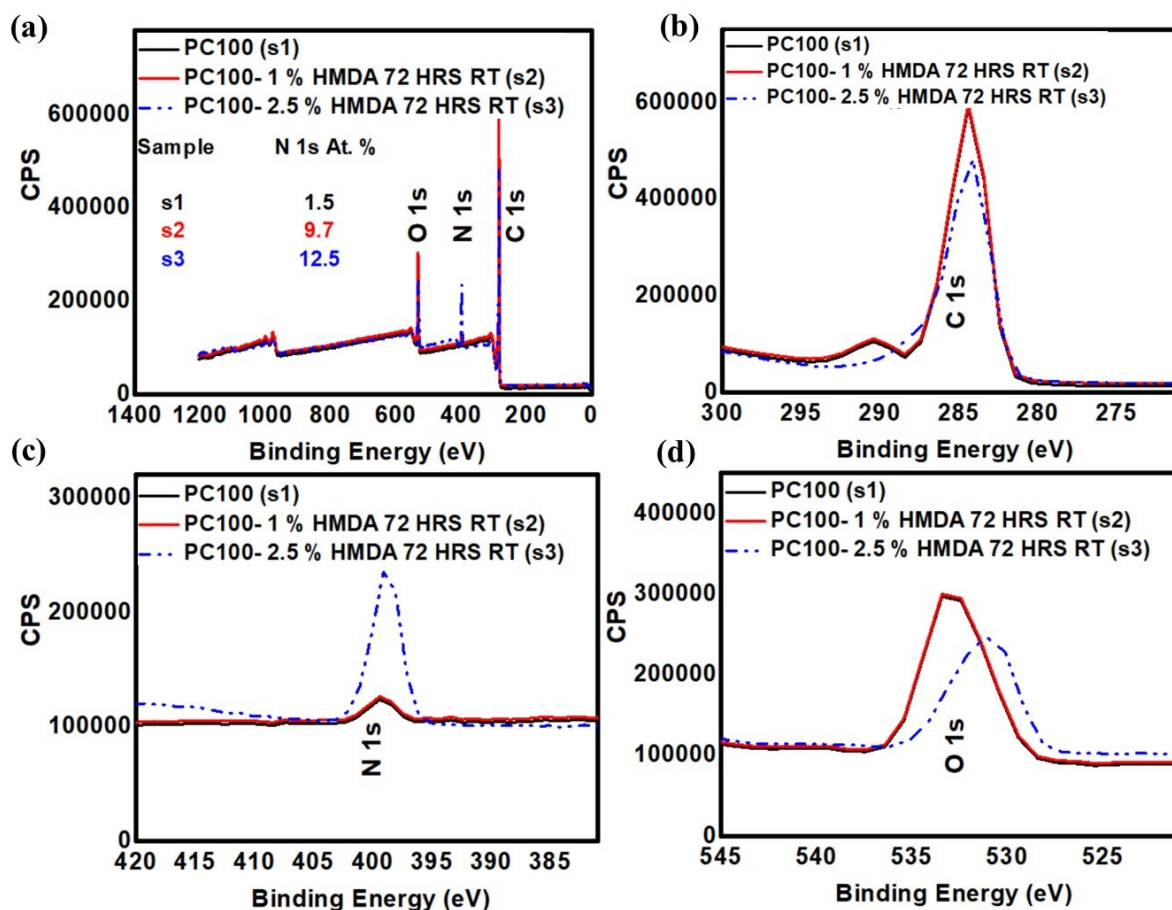

**Figure S5.** (a) XPS survey spectra of PC100 membranes before and after functionalisation with 1 % w/v HMDA (72 h at RT) and 2.5 % w/v HMDA (72 h at RT), with N 1s atomic % indicated. High-resolution spectra of (b) C 1s (270-300 eV), (c) N 1s (380-420 eV), and (d) O 1s (520-545 eV) regions show increased N 1s signal and shifts in C 1s and O 1s peaks, confirming successful HMDA grafting onto PC membranes.



**Table S3.** Summary of elemental quantification obtained from XPS survey spectra, for HMDA functionalised PCs.

| Sample                               | Atomic % |      |      |      |       |       |       |
|--------------------------------------|----------|------|------|------|-------|-------|-------|
|                                      | O 1s     | C 1s | N 1s | S 2p | Cl 2p | Na 1s | Si 2p |
| PC100-Blank                          | 14.8     | 81.6 | 3.4  | 0.2  | -     | -     | -     |
| PC100-HMDA,<br>1 % w/v, 72 h at RT   | 12.5     | 77.7 | 9.7  | 0.1  | 0.1   | -     | -     |
| PC100-HMDA,<br>2.5 % w/v, 72 h at RT | 11.3     | 76.1 | 12.5 | 0.1  | -     | -     | -     |

**Table S4.** Summary of elemental quantification obtained from XPS survey spectra, for TETA functionalised PCs.

| Sample                                            | Atomic % |      |      |      |       |       |       |
|---------------------------------------------------|----------|------|------|------|-------|-------|-------|
|                                                   | O 1s     | C 1s | N 1s | S 2p | Cl 2p | Na 1s | Si 2p |
| PC100-Blank                                       | 14.8     | 81.6 | 3.4  | 0.2  | -     | -     | -     |
| PC100-TETA, 1 % w/v,<br>74 h at RT + 2 h at 70 °C | 14.5     | 72.3 | 12.1 | 0.1  | 0.4   | 0.6   | -     |
| PC100-TETA,<br>5 % w/v,<br>2 h at 70 °C           | 13.1     | 64.0 | 22.6 | 0.1  | 0.2   | -     | -     |
| PC-50-Blank                                       | 16.4     | 81.0 | 2.1  | 0.3  | 0.3   | -     | -     |
| PC50-TETA, 5 % w/v,<br>2 h at 70 °C               | 13.9     | 64.0 | 21.4 | 0.1  | 0.4   | 0.1   | -     |
| PC15 Blank                                        | 16.0     | 80.5 | 2.6  | 0.2  | 0.7   | -     | -     |
| PC15-TETA, 5 % w/v,<br>2 h at 70 °C               | 14.5     | 64.8 | 20.1 | 0.1  | 0.3   | 0.2   | -     |

**Table S5.** Contact angles of PC membranes (0.1, 0.05, and 0.015  $\mu\text{m}$ ) for untreated (blank) samples and for those treated with 5 % w/v PEI (0.8 kDa) for 72 h at room temperature, followed by heating at 70  $^{\circ}\text{C}$  for 2 h.

| Membrane                                                | Contact Angle Value ( $^{\circ}$ ) |
|---------------------------------------------------------|------------------------------------|
| 100 nm pore size:                                       |                                    |
| - PC100-BLANK                                           | 68.4                               |
| - PC-100-PEI, 72 h at RT                                | 63.3                               |
| - PC-100-PEI, 72 h at RT + 2 h at 70 $^{\circ}\text{C}$ | 48.6                               |
| 50 nm pore size:                                        |                                    |
| - PC50-BLANK                                            | 67.8                               |
| - PC-50-PEI, 72 h at RT                                 | 58.2                               |
| - PC-50-PEI, 72 h at RT + 2 h at 70 $^{\circ}\text{C}$  | 36.1                               |
| 15 nm pore size:                                        |                                    |
| - PC15-BLANK                                            | 64.5                               |
| - PC-15- PEI, 72 h at RT                                | 59.5                               |
| - PC-15-PEI, 72 h at RT + 2 h at 70 $^{\circ}\text{C}$  | 34.3                               |

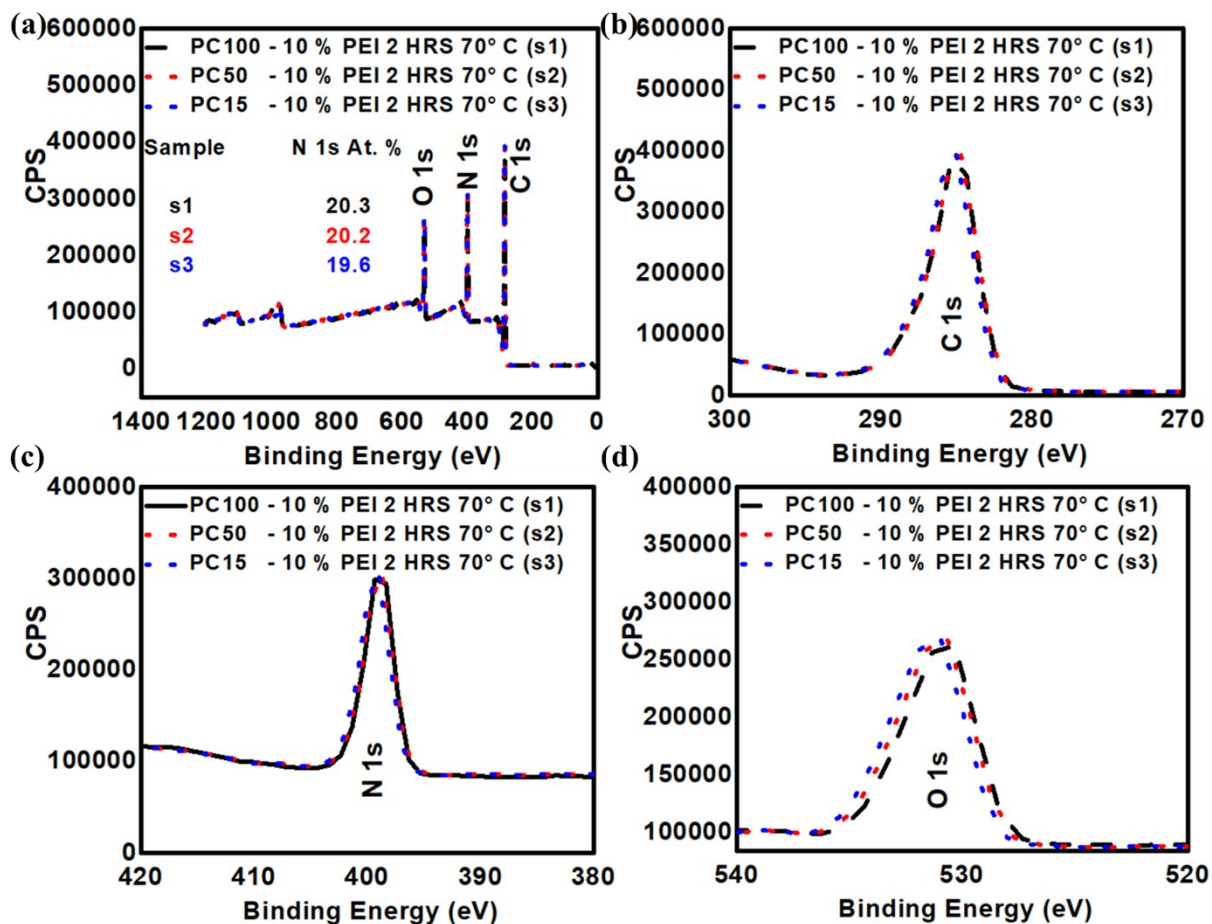

**Figure S6.** (a)XPS survey spectra of PC100, PC50 and PC15 membranes before and after functionalisation with 10 % w/v PEI 800D (72 h at 70 °C), with N 1s atomic % indicated. High-resolution spectra of (b) C 1s (270-300 eV), (c) N 1s (380-420 eV), and (d) O 1s (520-545 eV) regions.

**Table S6.** Summary of elemental quantification obtained from XPS survey spectra, for PEI functionalised PCs.

| Sample                                              | Atomic % |      |      |      |       |       |       |
|-----------------------------------------------------|----------|------|------|------|-------|-------|-------|
|                                                     | O 1s     | C 1s | N 1s | S 2p | Cl 2p | Na 1s | Si 2p |
| PC100-PEI,<br>5 % w/v,<br>72 h at RT + 2 h at 70 °C | 13.3     | 70.5 | 16.0 | 0.1  | 0.1   | -     | -     |
| PC100-PEI,<br>10 % w/v,<br>2 h at 70 °C             | 12.9     | 66.3 | 20.3 | 0.1  | 0.2   | 0.1   | -     |
| PC50-PEI,<br>10 % w/v,<br>2 h at 70 °C              | 13.8     | 65.0 | 20.2 | 0.1  | 0.5   | 0.3   | -     |
| PC15-PEI,<br>10 % w/v,<br>2 h at 70 °C              | 13.5     | 65.9 | 19.6 | 0.1  | 0.6   | 0.2   | -     |

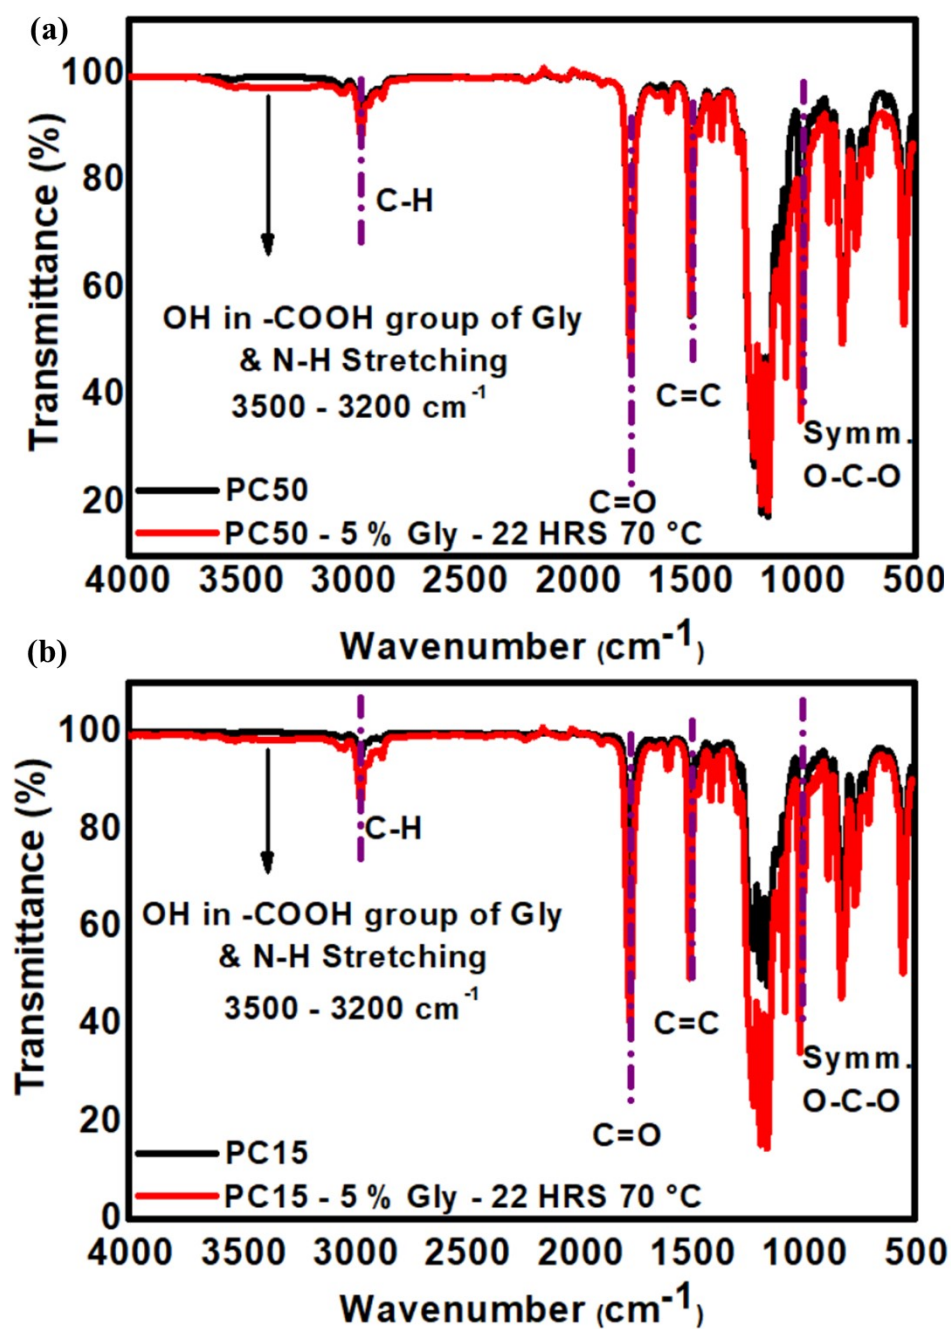

**Figure S7.** FTIR spectra of (a) PC50 and (b) PC15 membranes before and after functionalisation with Gly 5 % w/v.

**Table S7.** Summary of elemental quantification obtained from XPS survey spectra, for GLY functionalised PCs.

| Sample                                                  | Atomic % |      |      |      |       |       |       |
|---------------------------------------------------------|----------|------|------|------|-------|-------|-------|
|                                                         | O 1s     | C 1s | N 1s | S 2p | Cl 2p | Na 1s | Si 2p |
| PC100-Glycine,<br>1 % w/v,<br>72 h at RT + 2 h at 70 °C | 16.1     | 81.4 | 2.2  | 0.1  | -     | -     | 0.2   |
| PC100-Glycine,<br>5 % w/v,<br>22 h at 70 °C             | 16.3     | 81.0 | 2.3  | 0.1  | 0.3   | -     | -     |
| PC50-Glycine,<br>5 % w/v,<br>22 h at 70 °C              | 24.6     | 66.9 | 2.5  | -    | 4.8   | -     | -     |
| PC15-Glycine,<br>5% w/v,<br>22 h at 70 °C               | 16.7     | 80.0 | 2.2  | 0.2  | 0.7   | 0.1   | 0.2   |
